# Supplementary material for: Novel Transaminase and Laccase from Streptomyces spp. Using Combined Identification Approaches
Source: MDPI journal article supplement (doi:10.3390/catal11080919), 2021-07-29
Supplement: s1 [file s1]

## Supporting information

# Novel Transaminase and Laccase from *Streptomyces* spp. Using Combined Identification Approaches

Erica E. Ferrandi <sup>1</sup>, Jelena Spasic <sup>2</sup>, Lidija Djokic <sup>2</sup>, Yevhen Vainshtein <sup>3</sup>, Ramsankar Senthamaraikannan <sup>4</sup>, Sandra Vojnovic <sup>2</sup>, Christian Grumaz <sup>3</sup>, Daniela Monti <sup>1, \*</sup> and Jasmina Nikodinovic-Runic <sup>2,\*</sup>

<sup>1</sup> Istituto di Scienze e Tecnologie Chimiche (SCITEC), Consiglio Nazionale delle Ricerche, via Mario Bianco 9, Milan, Italy; erica.ferrandi@scitec.cnr.it (E.E.F.); daniela.monti@scitec.cnr.it (D.M.)

<sup>2</sup> Institute of Molecular Genetics and Genetic Engineering, University of Belgrade, Vojvode Stepe 444a, Belgrade, 11221, Serbia; lidijadjokic@imgge.bg.ac.rs (L.Dj.); sandravojnovic@imgge.bg.ac.rs (S.V.)

<sup>3</sup> Fraunhofer Institute for Interfacial Engineering (IGB), In-vitro diagnostics, Nobelstrasse 12, 70569 Stuttgart, Germany; yevhen.vainshtein@igb.fraunhofer.de (Y.V.)

<sup>4</sup> AMBER Centre, Trinity College Dublin, College Green, Dublin 2, Ireland; Ramsankar.S@tcd.ie (R.S)

\* Correspondence: [jasmina.nikodinovic@gmail.com](mailto:jasmina.nikodinovic@gmail.com); [jasmina.nikodinovic@imgge.bg.ac.rs](mailto:jasmina.nikodinovic@imgge.bg.ac.rs) Tel.: +381 11 397 60 34 (J.N.-R.); daniela.monti@scitec.cnr.it Tel.: +39 02 28500025 (D.M.)

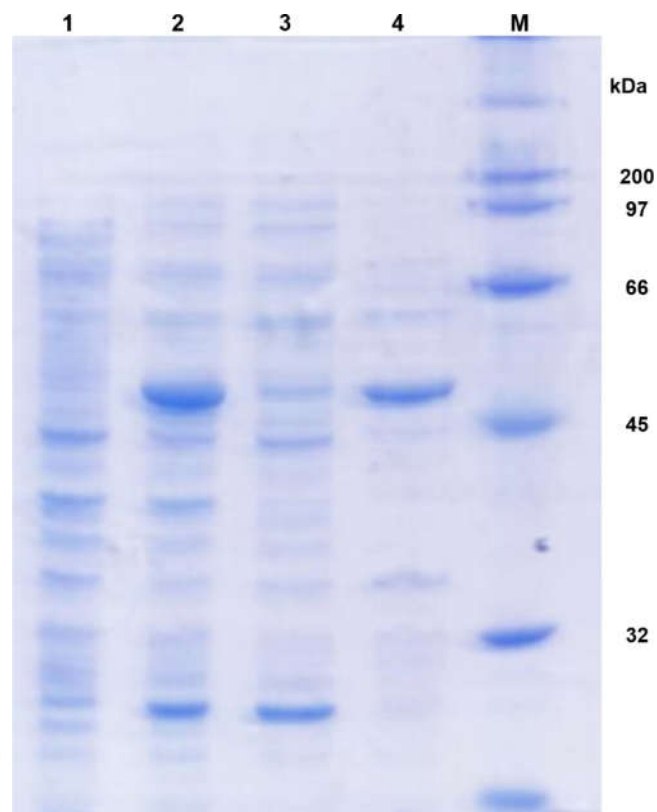

**Figure S1.** SDS-PAGE *E. coli* Rosetta expressing aminotransferase from pEtite\_BV333 TA. 1) before the induction 2) after the induction with IPTG 3) cell lysate 4) purified enzyme M) Marker – SDS-PAGE Standard Broad Range (Bio-Rad, USA).

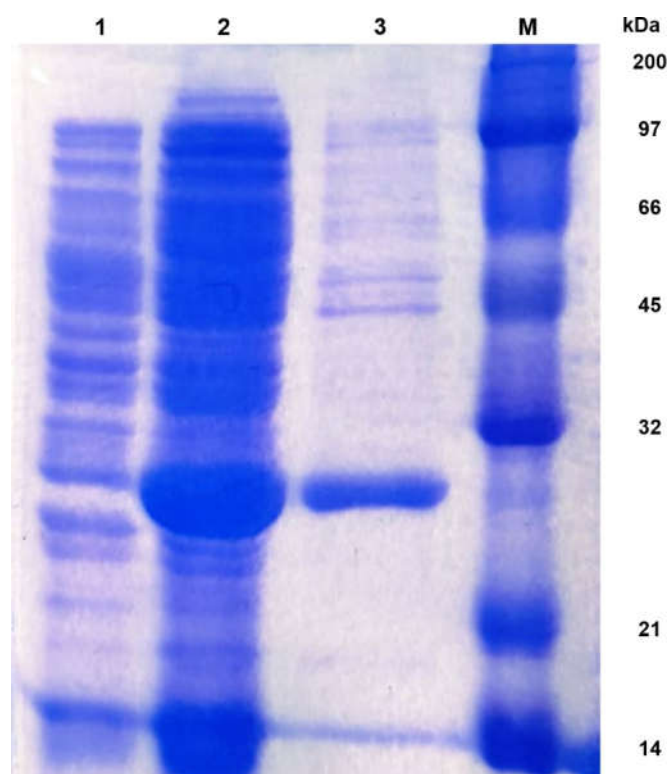

**Figure S2.** SDS-PAGE gel of purified laccase Sbv286-LAC. 1) before the induction 2) after the induction with IPTG 3) purified enzyme M) Marker – SDS-PAGE Standard Broad Range (Bio-Rad, USA).

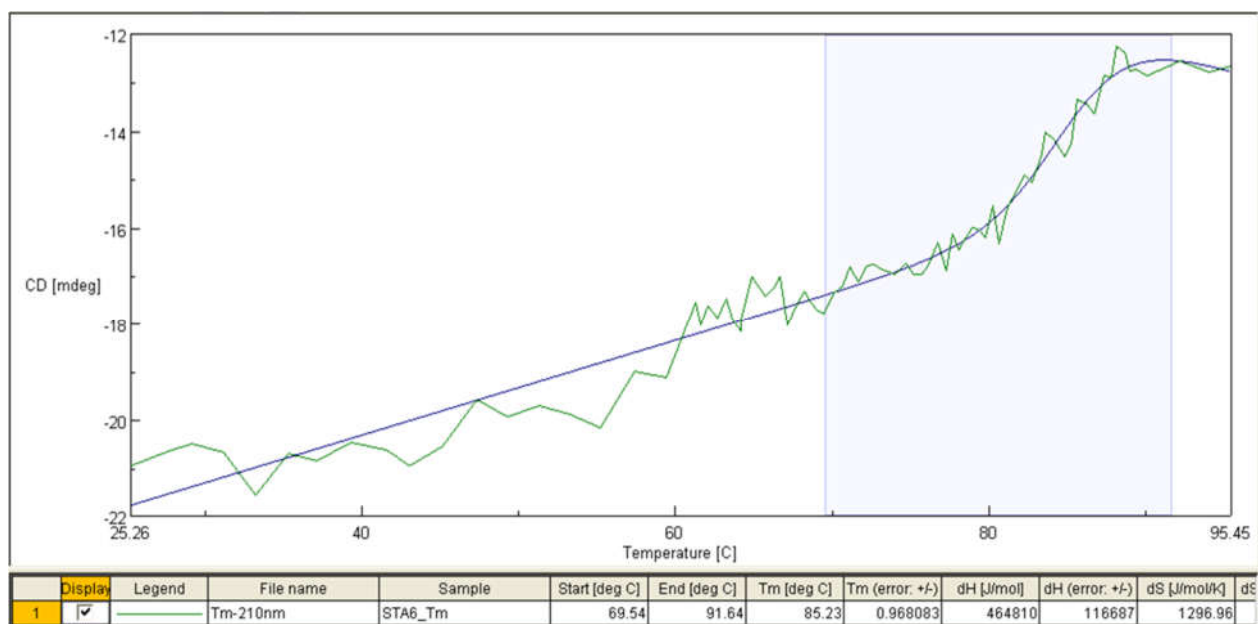

**Figure S3.** Sbv333-TA melting temperature curve obtained by circular dichroism spectroscopic analysis at 210 nm

**Table S1.** Bioinformatics tools used to perform phylogenetic classification.

| Tool                                     | Reference                                                                                                                                                                                                                                         |
|------------------------------------------|---------------------------------------------------------------------------------------------------------------------------------------------------------------------------------------------------------------------------------------------------|
| TYGS: Type (Strain) Genome Server (TYGS) | Meier-Kolthoff JP, Göker M. TYGS is an automated high-throughput platform for state-of-the-art genome-based taxonomy. <i>Nat. Commun.</i> 2019;10: 2182. DOI: 10.1038/s41467-019-10210-3                                                          |
| RNAmmer                                  | Lagesen K, Hallin P. RNAmmer: consistent and rapid annotation of ribosomal RNA genes. <i>Nucleic Acids Res. Oxford Univ Press;</i> 2007;35: 3100–3108. DOI: 10.1093/nar/gkm160                                                                    |
| BLAST                                    | Camacho C, Coulouris G, Avagyan V, Ma N, Papadopoulos J, Bealer K, et al. BLAST+: architecture and applications. <i>BMC Bioinformatics.</i> 2009;10: 421. DOI: 10.1186/1471-2105-10-421                                                           |
| Genome BLAST Distance Phylogeny (GBDP)   | Meier-Kolthoff JP, Auch AF, Klenk H-P, Göker M. Genome sequence-based species delimitation with confidence intervals and improved distance functions. <i>BMC Bioinformatics.</i> 2013;14: 60. DOI: 10.1186/1471-2105-14-60                        |
| FASTME 2.1.4                             | Lefort V, Desper R, Gascuel O. FastME 2.0: A comprehensive, accurate, and fast distance-based phylogeny inference program. <i>Mol Biol Evol.</i> 2015;32: 2798–2800. DOI: 10.1093/molbev/msv150                                                   |
| PhyD3                                    | Kreft L, Botzki A, Coppens F, Vandepoele K, Van Bel M. PhyD3: A phylogenetic tree viewer with extended phyloXML support for functional genomics data visualization. <i>Bioinformatics.</i> 2017;33: 2946–2947. DOI: 10.1093/bioinformatics/btx324 |

**Table S2.** GenBank accession number of query sequences used in the bioinformatics search for novel ATA. Entry 1-10: (*S*)-selective ATA, Entry 11-18: (*R*)-selective ATA.

| Entry | GenBank accession number | Organism                                    |
|-------|--------------------------|---------------------------------------------|
| 1     | WP_011135573             | <i>Chromobacterium violaceum</i> ATCC 12472 |
| 2     | AEA39183.1               | <i>Vibrio fluvialis</i> JS17                |
| 3     | AAK25105.1               | <i>Caulobacter vibrioides</i> CB15          |
| 4     | ABL72050.1               | <i>Paracoccus denitrificans</i> PD1222      |
| 5     | WP_014457322             | <i>Acetobacter pasteurianus</i> IFO 3283-01 |
| 6     | WP_011982390             | <i>Ochrobactrum anthropi</i> ATCC 49188     |
| 7     | WP_003083801.1           | <i>Pseudomonas aeruginosa</i> PAO2          |
| 8     | AAP92672.1               | <i>Achromobacter denitrificans</i> Y2k-2    |
| 9     | KX505387                 | Uncultured organism                         |
| 10    | KX505388                 | Uncultured organism                         |
| 11    | KX505389                 | Uncultured organism                         |
| 12    | BAK39753.1               | <i>Arthrobacter</i> sp. KNK168              |
| 13    | XP_001209325             | <i>Aspergillus terreus</i> NIH2624          |
| 14    | XP_748821.1              | <i>Aspergillus fumigatus</i> Af293          |
| 15    | XP_001261640             | <i>Neosartorya fischeri</i> NRRL 181        |
| 16    | WP_011781668.1           | <i>Mycobacterium vanbaalenii</i> PYR-1      |
| 17    | WP_011647499.1           | <i>Hyphomonas neptunium</i> ATCC 15444      |
| 18    | CAD31279.1               | <i>Mesorhizobium loti</i> R7A               |

**Table S3.** GenBank accession number of query sequences used in the bioinformatics search for novel Laccases

| Entry | GenBank accession number | Organism                                                 |
|-------|--------------------------|----------------------------------------------------------|
| 1     | ABH10611.1               | <i>Streptomyces ipomoeae</i>                             |
| 2     | A0A656R8L8               | <i>Streptomyces griseorubens</i>                         |
| 3     | 3CG8                     | <i>Streptomyces coelicolor</i>                           |
| 4     | WP_004980371.1           | <i>Streptomyces viridosporus</i>                         |
| 5     | WP_128437084.1           | <i>Streptomyces cyaneus</i>                              |
| 6     | WP_007386096.1           | <i>Streptomyces svaceus</i> ATCC 29083                   |
| 7     | WP_069169798.1           | <i>Streptomyces griseus</i>                              |
| 8     | AGE62493.1               | <i>Bacillus subtilis</i> subsp. <i>subtilis</i> str. 168 |
| 9     | ZP_03054403.1            | <i>Bacillus subtilis</i> XF-1                            |
| 10    | AGE62493.1               | <i>Bacillus pumilus</i> ATCC 7061                        |
| 11    | BAC00361.1               | <i>Corynebacterium glutamicum</i> ATCC 13032             |
| 12    | AAS81712.1               | <i>Thermus thermophilus</i> HB27                         |
| 13    | 5B7E_A                   | <i>E. coli</i> K12                                       |

**Table S4.** Bacterial strains and plasmids used in this study

| <b>Bacterial strain/plasmid</b>                       | <b>Reference</b>              |
|-------------------------------------------------------|-------------------------------|
| <i>Streptomyces</i> sp. BV129                         | Spasic et al 2018b            |
| <i>Streptomyces</i> sp. BV286                         | Spasic et al 2018b            |
| <i>Streptomyces</i> sp. BV333                         | Spasic et al 2018b            |
| <i>E. coli</i> HI-Control 10G™                        | Lucigen, Middleton, USA       |
| <i>E. coli</i> BL21(DE3)                              | Lucigen, Middleton, USA       |
| <i>E. coli</i> Rosetta (DE3)                          | Merck, Darmstadt, Germany     |
| <i>E. coli</i> Rosetta (DE3)- Sbv333-TA               | This study                    |
| <i>E. coli</i> Rosetta (DE3)- Sbv286-LAC              | This study                    |
| <i>E.coli</i> BL21(DE3)-GroEs, GroEL-pETite-Sbv333-TA | This study                    |
| pETite (expression vector)                            | Lucigen, Middleton, USA       |
| pETite-Sbv333-TA                                      | This study                    |
| pETite-Sbv286-LAC                                     | This study                    |
| pGro7                                                 | Takara Bio Inc., Kyoto, Japan |



**Table S5.** Sequencing statistics

| <b>Sample ID</b>              | <b>Streptomyces<br/>sp. BV129</b> | <b>Streptomyces<br/>sp. BV286</b> | <b>Streptomyces<br/>sp. BV333</b> |
|-------------------------------|-----------------------------------|-----------------------------------|-----------------------------------|
| Yield (Mbases)                | 1,197                             | 1,237                             | 1,184                             |
| Nr. of reads                  | 7,982,434                         | 8,246,470                         | 7,890,548                         |
| Yield after trimming (Mbases) | 1,081                             | 1,113                             | 1,065                             |
| Nr. of trimmed reads          | 7,577,220                         | 7,778,364                         | 7,418,590                         |
| % of >= Q30 Bases (PF)        | 92.47                             | 91.93                             | 91.87                             |
| Mean Quality Score (PF)       | 36.93                             | 36.77                             | 36.75                             |

**Table S6.** Oligonucleotide primers used in this study

| <b>Primer name</b>        | <b>Sequence</b>                                     |
|---------------------------|-----------------------------------------------------|
| <b>pETite_BV333STA FP</b> | GAA GGA GAT ATA CAT ATG GGG AAC CCG ATA GCC GTG AGC |
| <b>pETite_BV333STA RP</b> | GTG ATG GTG GTG ATG ATG GAG CTT CGT CCA AGC CTC CGT |
| <b>pETite_BV286LAC FP</b> | GAA GGA GAT ATA CAT ATG AGC ACC ACG GAC GGC ATG GAC |
| <b>pETite_BV286LAC RP</b> | GTG ATG GTG GTG ATG ATG GTG CTC GTG CGG CTC GTA CCC |
| <b>T7 promoter</b>        | TAA TAC GAC TCA CTA TAG GG                          |
| <b>pETite reverse</b>     | CTC AAG ACC CGT TTA GAG GC                          |
